# Supplementary figures and images for: Terahertz time-domain absorption spectra of Cu(i) complexes bearing tetraphosphine ligands: the bridge between the C–H⋯π and π⋯π interactions and photoluminescence properties
Source: Royal Society of Chemistry journal article supplement (doi:10.1039/d0dt02542a), 2020-01-01

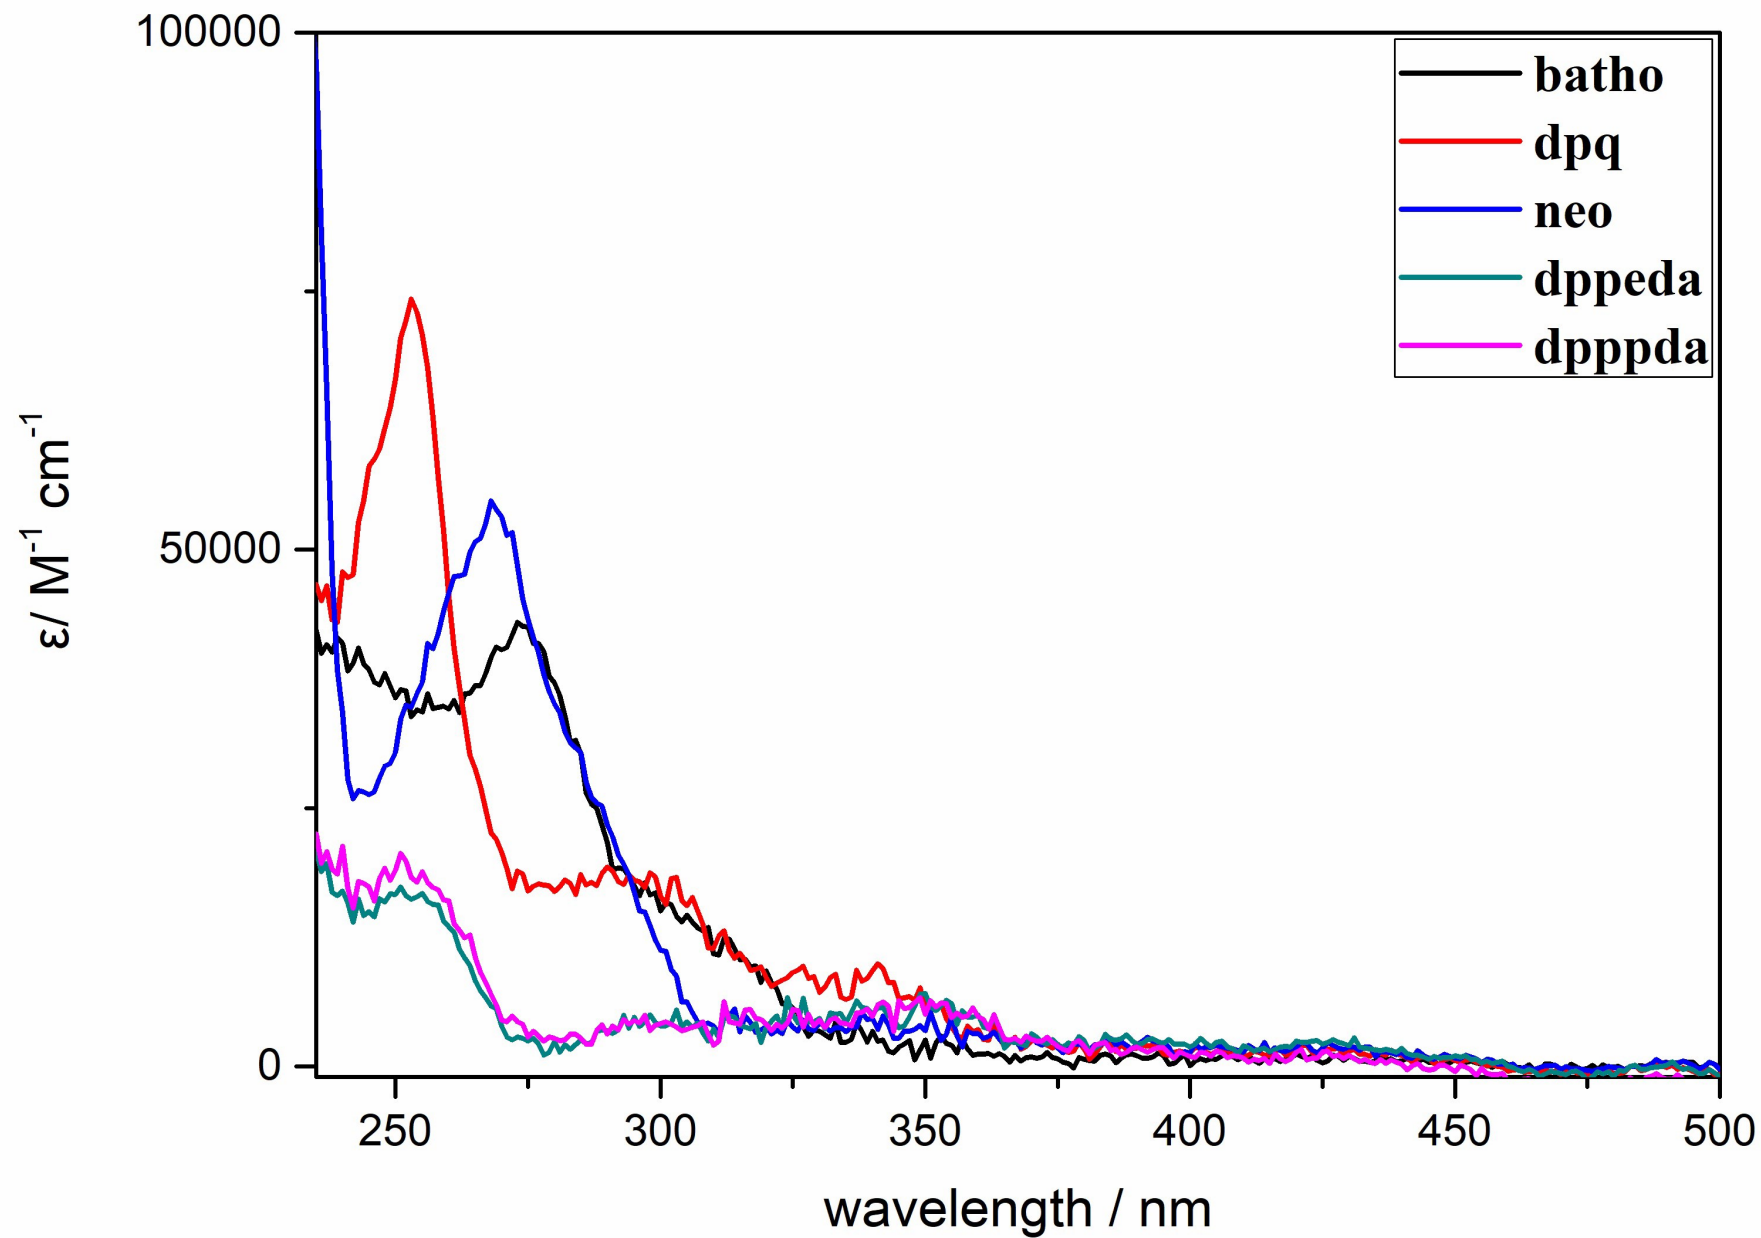

Supplement: d0dt02542a2.pdf [file d0dt02542a2.pdf]

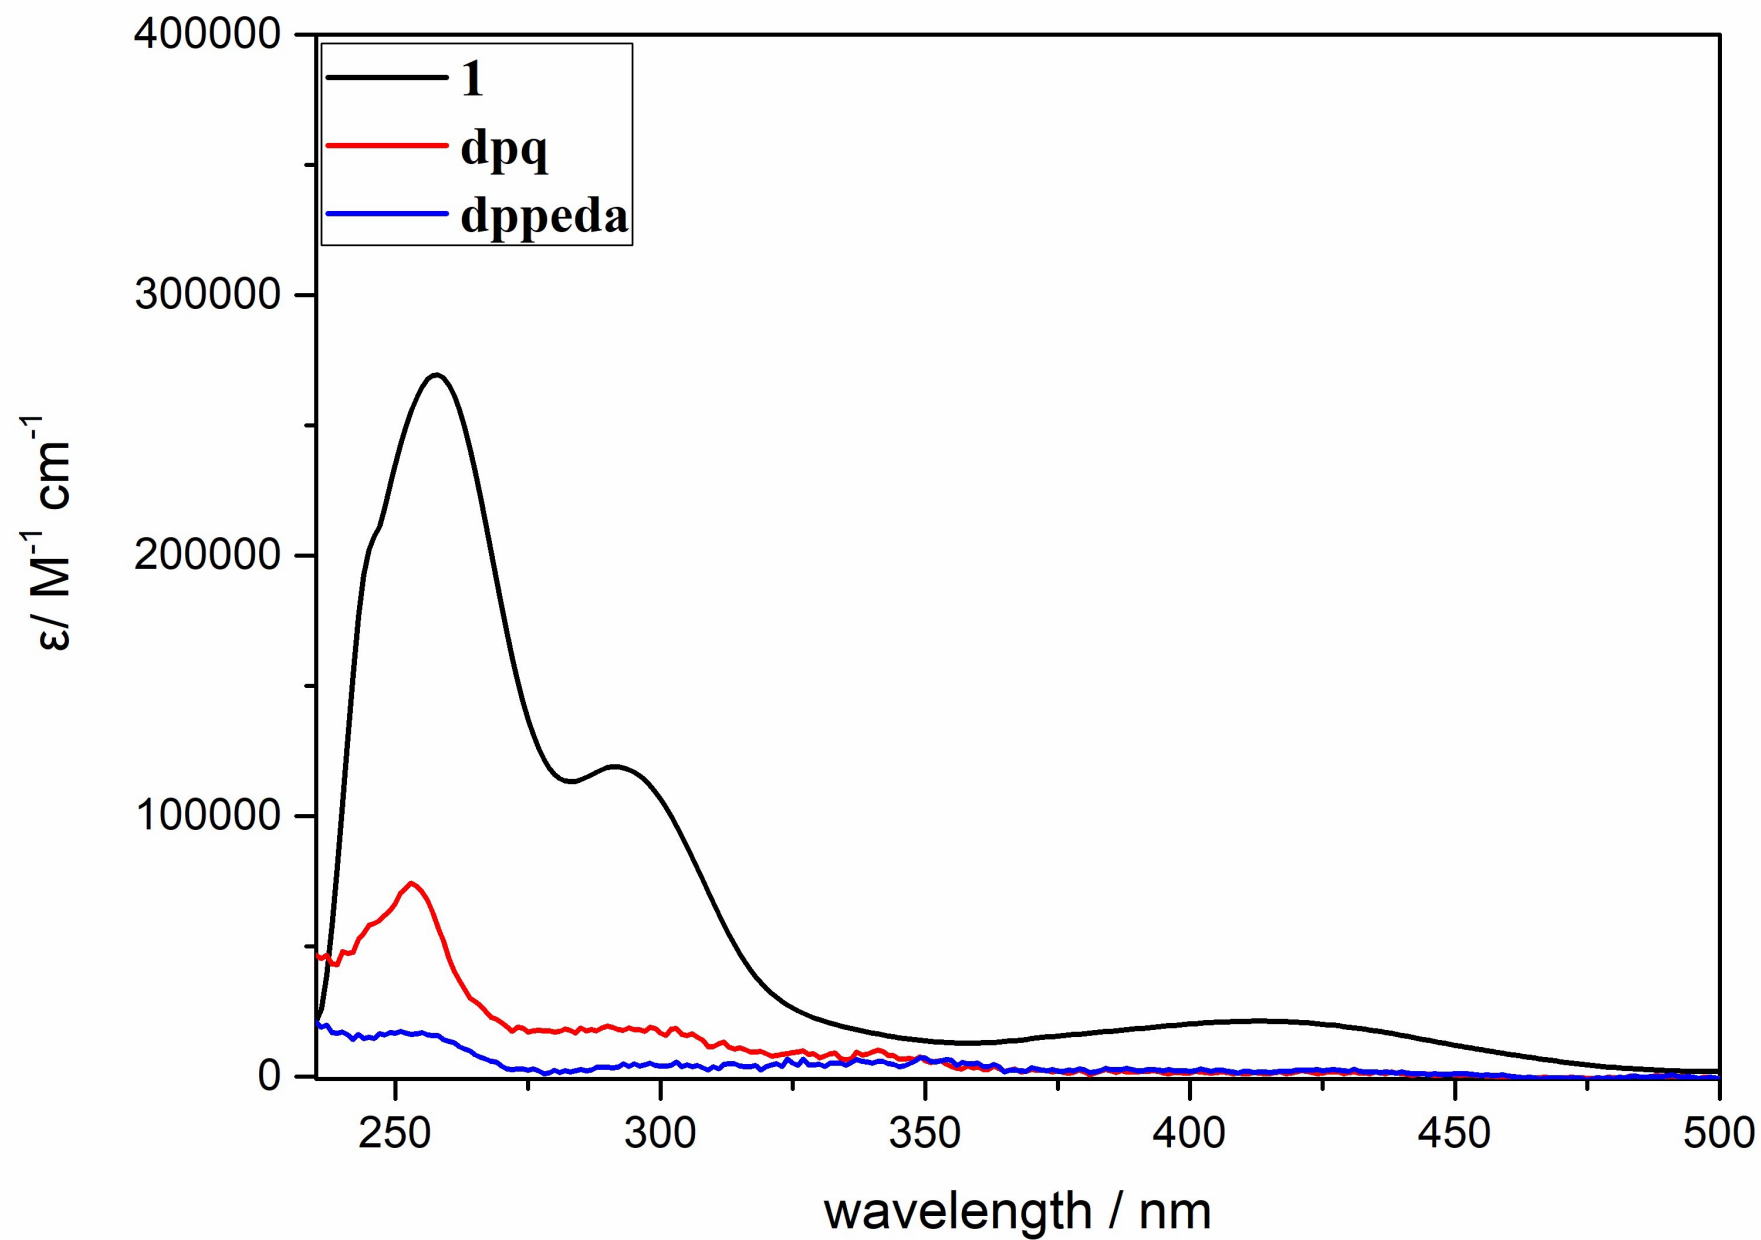

Supplement: d0dt02542a3.pdf [file d0dt02542a3.pdf]

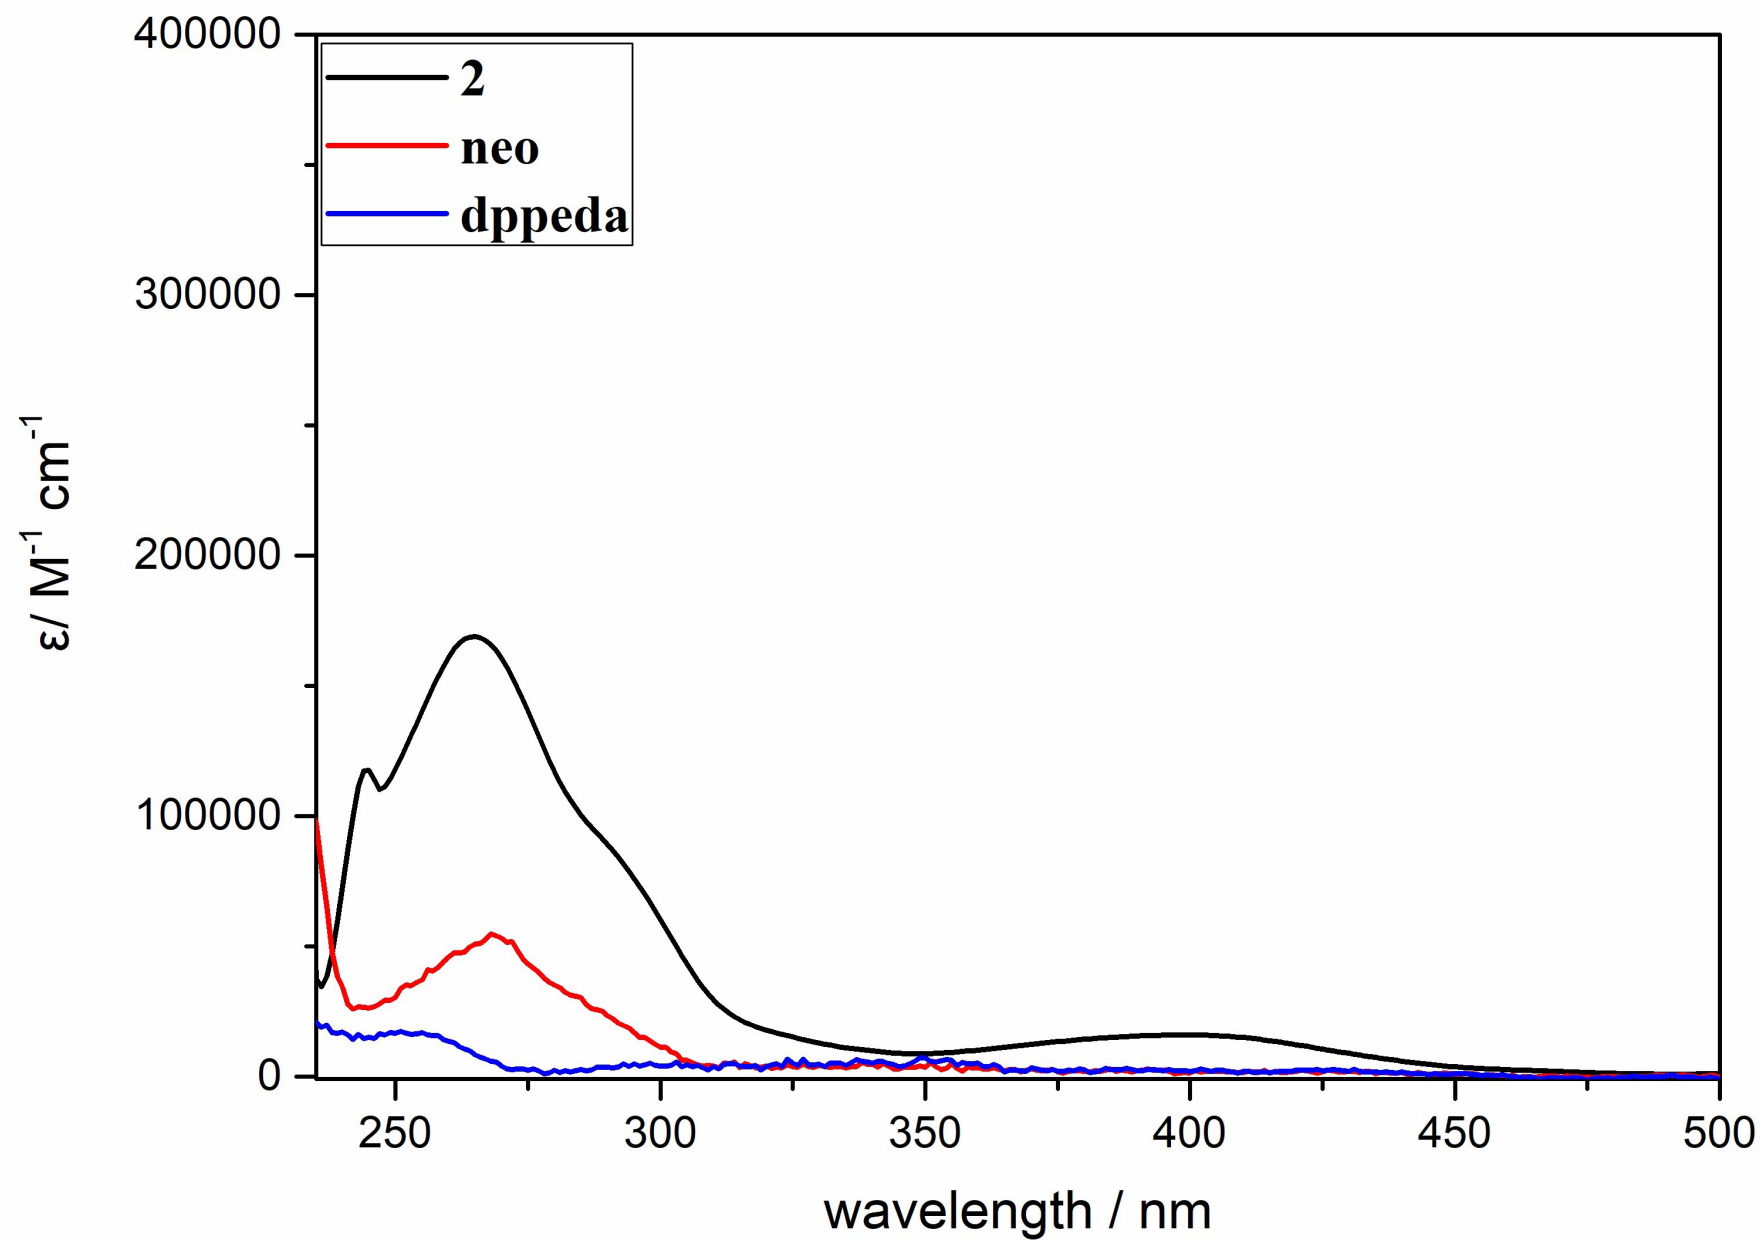

Supplement: d0dt02542a4.pdf [file d0dt02542a4.pdf]

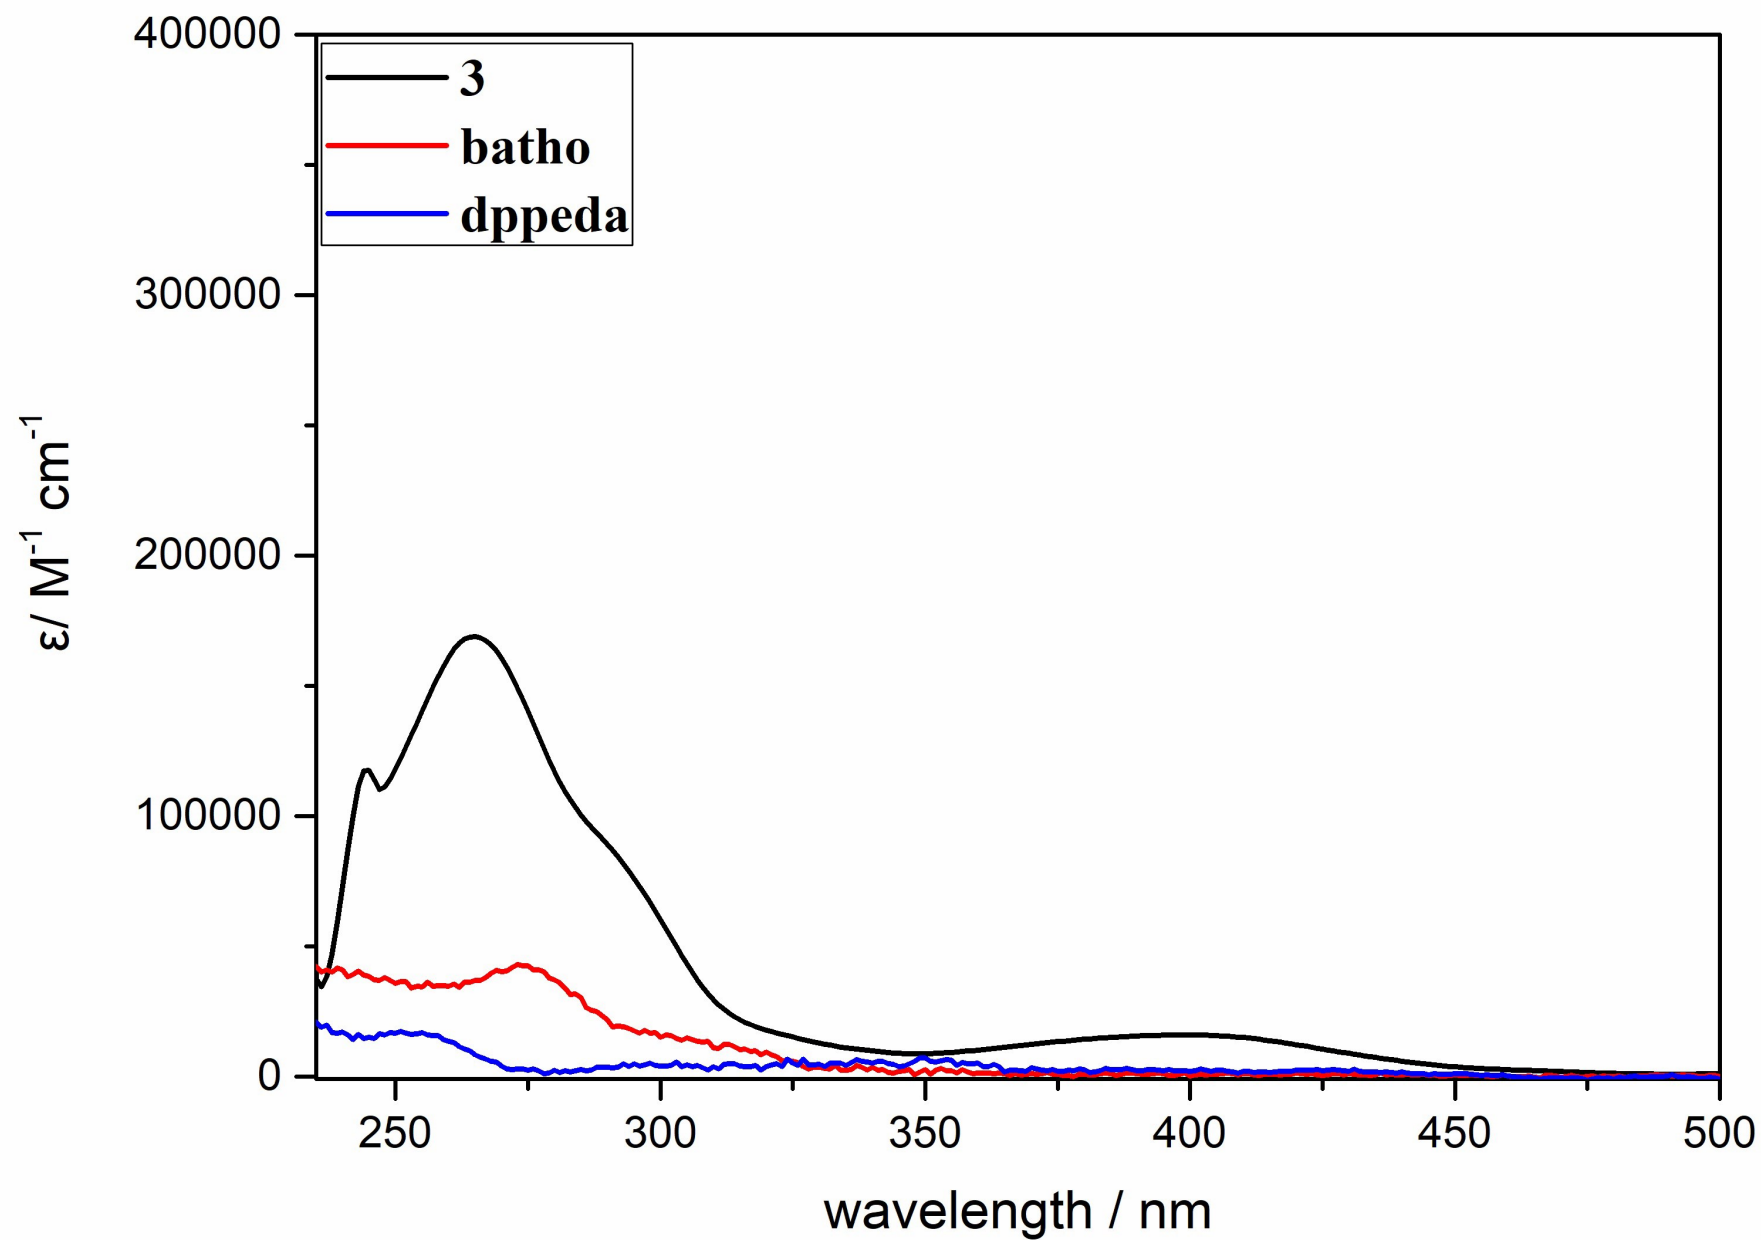

Supplement: d0dt02542a5.pdf [file d0dt02542a5.pdf]
